# Supplementary material for: A portable micro glucose sensor based on copper-based nanocomposite structure
Source: Royal Society of Chemistry journal article supplement (doi:10.1039/c9nj00888h), 2019-01-01
Supplement: c9nj00888h1.pdf [file c9nj00888h1.pdf]

## Supporting Information for

### **A portable micro glucose sensor based on copper based nano-composite structure**

Huang Chen<sup>a, b, §</sup>, Guokang Fan<sup>a, b, §</sup>, Jie Zhao<sup>c, \*</sup>, Meijia Qiu<sup>a</sup>, Peng Sun<sup>a, b, \*</sup>, Yifeng Fu<sup>f</sup>, Dongxue Han<sup>d, e</sup>, Guofeng Cui<sup>a, b, \*</sup>

<sup>a</sup>Key Laboratory for Polymeric Composite & Functional Materials of Ministry of Education, The Key Lab of Low-Carbon Chemistry and Energy Conservation of Guangdong Province, School of Chemistry, Sun Yat-sen University, Guangzhou, 510275, China

<sup>b</sup>Guangzhou Mecart Smart Technology Research Institute, Guangzhou, 510275, China

<sup>c</sup>School of Mechanical and Automotive Engineering, South China University of Technology, Guangzhou, 510640, China

<sup>d</sup>Center for Advanced Analytical Science, c/o School of Chemistry and Chemical Engineering, Guangzhou University, Guangzhou 510006, PR China

<sup>e</sup>State Key Laboratory of Electroanalytical Chemistry, c/o Engineering Laboratory for Modern Analytical Techniques, Changchun Institute of Applied Chemistry, Chinese Academy of Science, Changchun, 130022, Jilin, PR China

<sup>f</sup>Electronics Materials and Systems Laboratory, Department of Microtechnology and Nanoscience, Chalmers University of Technology, SE - 412 96, Gothenburg, Sweden

Corresponding to e-mail: [cuiyf@mail.sysu.edu.cn](mailto:cuiyf@mail.sysu.edu.cn); [zhaoj77@scut.edu.cn](mailto:zhaoj77@scut.edu.cn);

[sunp25@mail2.sysu.edu.cn](mailto:sunp25@mail2.sysu.edu.cn)

§ These two authors contribute equally to this work

**Table S1.** Composition of copper plating solution

| <b>Component</b>                                            | <b>Concentration (g/l)</b> | <b>Manufacturer</b>                                 |
|-------------------------------------------------------------|----------------------------|-----------------------------------------------------|
| $\text{Cu}_2\text{P}_2\text{O}_7 \cdot 3\text{H}_2\text{O}$ | 65.00                      | Aladdin Industrial Corporation                      |
| $\text{K}_4\text{P}_2\text{O}_7 \cdot 3\text{H}_2\text{O}$  | 380.00                     | Fuchen Chemical Reagent Co., Ltd. (Tianjin , China) |
| $\text{C}_6\text{H}_5\text{O}_7 (\text{NH}_4)_3$            | 23.00                      | Aladdin Industrial Corporation                      |
| Citric acid                                                 | 0.5                        | Guangzhou Chemical Reagent Factory                  |

**Table S2.** Composition of copper tin plating solution

| <b>Component</b>                                            | <b>Concentration<br/>(g/l)</b> | <b>Manufacturer</b>                                 |
|-------------------------------------------------------------|--------------------------------|-----------------------------------------------------|
| $\text{Cu}_2\text{P}_2\text{O}_7 \cdot 3\text{H}_2\text{O}$ | 19.00                          | Aladdin Industrial Corporation                      |
| $\text{Sn}_2\text{P}_2\text{O}_7$                           | 15.60                          | Aladdin Industrial Corporation                      |
| $\text{K}_4\text{P}_2\text{O}_7 \cdot 3\text{H}_2\text{O}$  | 280.00                         | Fuchen Chemical Reagent Co., Ltd. (Tianjin , China) |
| $\text{K}_2\text{HPO}_4 \cdot 3\text{H}_2\text{O}$          | 80.00                          | Sinopharm Chemical Reagent Co., Ltd                 |
| $\text{H}_3\text{PO}_4$                                     | 3.95                           | Guangzhou Chemical Reagent Factory                  |

**Scheme S1.** Process for modifying Cu-Sn alloy on working electrode.

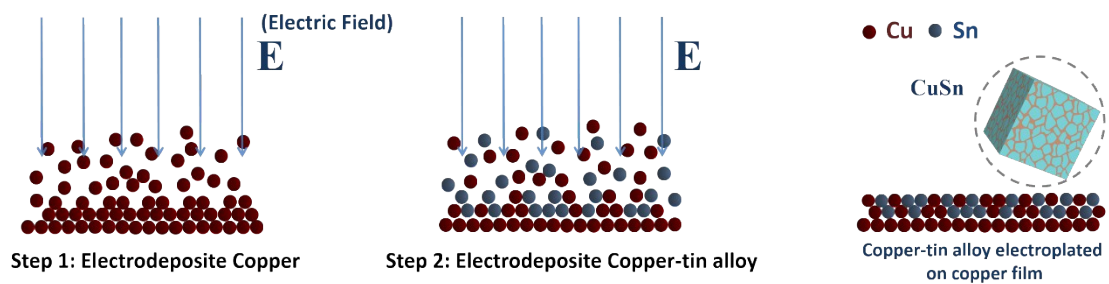

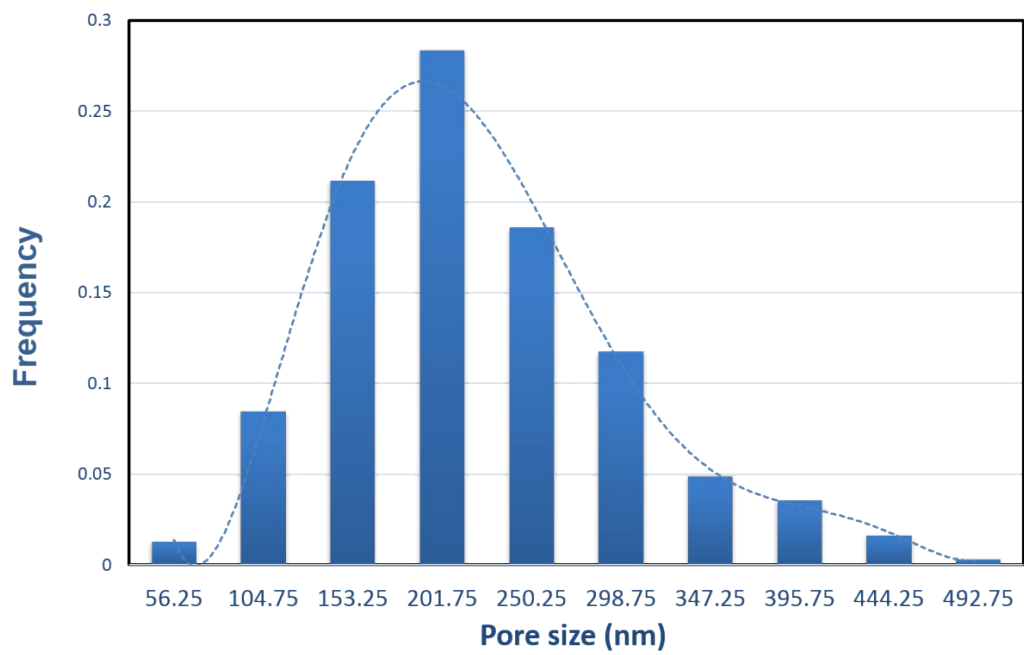

**Figure S1** Pore size distributions of NPC

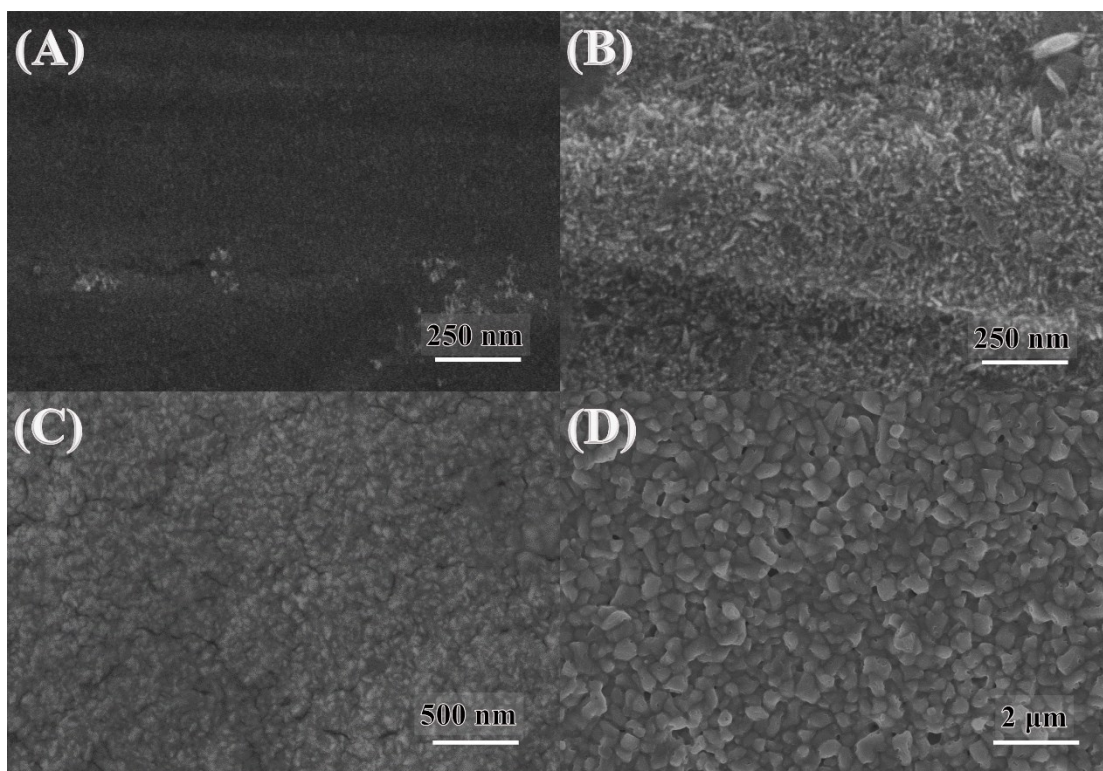

**Figure S2.** SEM images of (A) Cu substrate, (B) CuO fabricated on the substrate, (C) platinum and (D) Ag-AgCl electrode

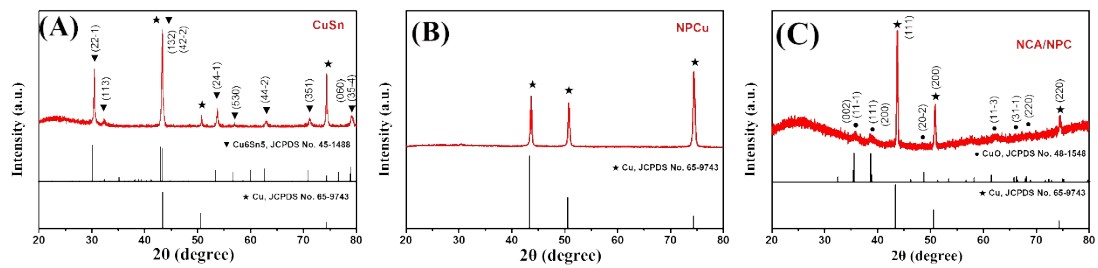

**Figure S3.** XRD patterns of (A) Cu-Sn, (B) NPCu and (C) NCA/NPC.

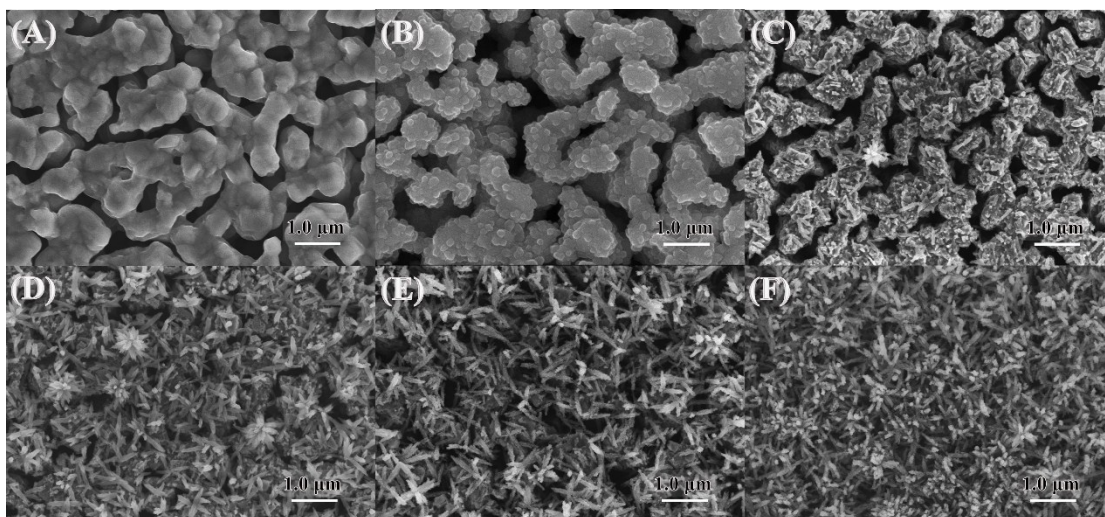

**Figure S4.** SEM images of NCA/NPC synthesized for (A) 0 s, (B) 120 s, (C) 240 s, (D) 360 s, (E) 480 s and (F) 600 s at 10 °C.



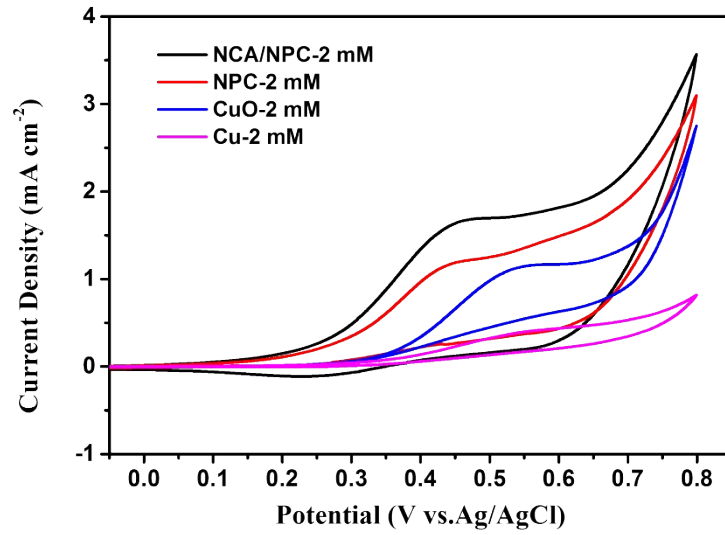

**Figure S5.** CV curves of Cu, CuO, NPC and NCA/NPC in 0.1 M KOH with 2 mM glucose at the scan rate of 50 mV s<sup>-1</sup>.

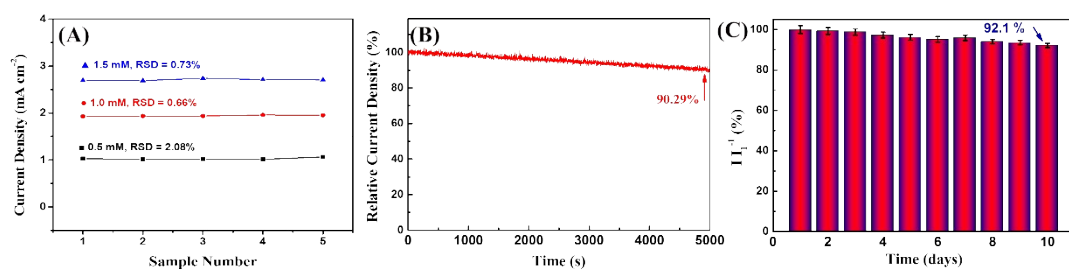

**Figure S6.** (A) Relative standard deviation of the response current for 5 pieces of modified electrode towards various glucose concentration. (B) Amperometric response of the electrodes to 1 mM glucose in 0.1 M KOH at 0.60 V for 5000 s. (C) The stability of the NCA/NPC glucose sensor device over a ten-day storage period.

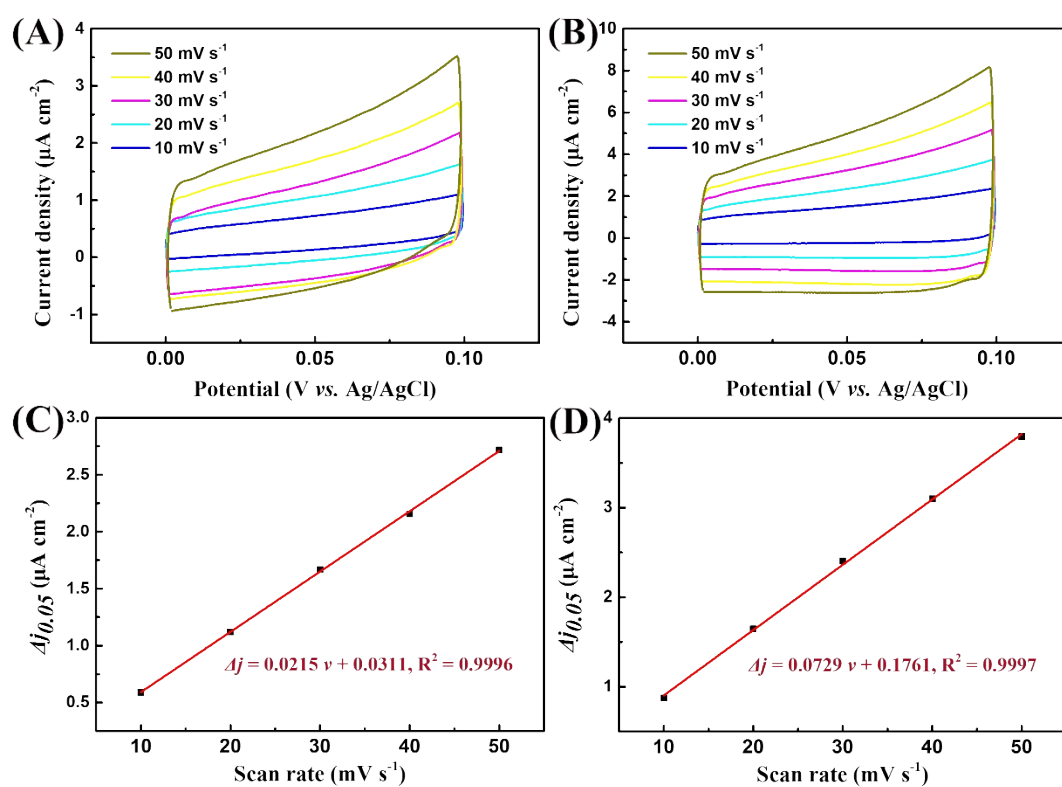

**Figure S7.** CVs for (A) Cu and (B) CuO electrode with different scan rates. The capacitive current-scan rate calibration plots of (C) Cu and (D) CuO at 0.05 V ( $\Delta j_{0.05} = (j_a - j_c)/2$ ).
